# Supplementary material for: Modulation of halogens in organic manganese halides for high-resolution and large-area flexible X-ray imaging
Source: Royal Society of Chemistry journal article supplement (doi:10.1039/d4qi02522a), 2024-11-19
Supplement: d4qi02522a1.pdf [file d4qi02522a1.pdf]

Electronic Supplementary Material (ESI) for Inorganic Chemistry  
Frontiers.

## **Modulation of Halogens in Organic Manganese Halides for High-resolution and Large-area Flexible X-ray Imaging**

Ying Sun,<sup>a</sup> Qian Ma,<sup>b</sup> Dongheng Zhao,<sup>b</sup> Pan Gao,<sup>a</sup> Qi Wang,<sup>a</sup> Zeyu Guo,<sup>a</sup>  
and Xiaomei Jiang<sup>a\*</sup>

<sup>a</sup>School of Preventive Medicine Sciences (Institute of Radiation  
Medicine), Shandong First Medical University & Shandong Academy of  
Medical Sciences, No. 6699 Qingdao Road, Jinan n 250117, People's  
Republic of China

<sup>b</sup>School of Material Science and Engineering, University of Jinan, No.336  
Nanxinzhuang West Road, Jinan 250022, People's Republic of China.

**\*Corresponding authors.**

E-mail addresses: [jiangxiaomei@sdfmu.edu.cn](mailto:jiangxiaomei@sdfmu.edu.cn)

**Table S1.** Crystallographic data and refinement details for  $(C_6H_8N)_2MnX_4$  (X=Cl, Br, I).

| Empirical                                               | $(C_6H_8N)_2MnCl_4$                                                                                         | $(C_6H_8N)_2MnBr_4$                                                                                         | $(C_6H_8N)_2MnI_4$                                                                   |
|---------------------------------------------------------|-------------------------------------------------------------------------------------------------------------|-------------------------------------------------------------------------------------------------------------|--------------------------------------------------------------------------------------|
| <b>Formula</b>                                          |                                                                                                             |                                                                                                             |                                                                                      |
| <b>Weight/g·mol<sup>-1</sup></b>                        | 385.01                                                                                                      | 562.85                                                                                                      | 750.81                                                                               |
| <b>Crystal System</b>                                   | monoclinic                                                                                                  | monoclinic                                                                                                  | orthorhombic                                                                         |
| <b>Space Group</b>                                      | I2/a                                                                                                        | C2/c                                                                                                        | Pbca                                                                                 |
| <b>Unit Cell Dimensions</b>                             | a=16.0523(11) Å<br>b=8.4560(4) Å<br>c=26.4946(19) Å<br>$\alpha=\gamma=90^\circ$<br>$\beta=104.499(7)^\circ$ | a= 27.928(6) Å<br>b= 8.7713(17) Å<br>c= 16.385(3) Å<br>$\alpha=\gamma=90^\circ$<br>$\beta=110.162(7)^\circ$ | a=8.7700(10) Å<br>b= 15.195(2) Å<br>c= 31.508(4) Å<br>$\alpha=\gamma=\beta=90^\circ$ |
| <b>Volume/Å<sup>3</sup></b>                             | 3481.8(4) Å <sup>3</sup>                                                                                    | 3767.8(13) Å <sup>3</sup>                                                                                   | 4198.76(9)                                                                           |
| <b><math>\rho_{calc}/g\cdot cm^{-3}</math></b>          | 1.469                                                                                                       | 1.98435                                                                                                     | 2.375                                                                                |
| <b>Z</b>                                                | 8                                                                                                           | 8                                                                                                           | 8                                                                                    |
| <b>Index Ranges</b>                                     | -14 ≤ h ≤ 19,<br>-10 ≤ k ≤ 8,<br>-31 ≤ l ≤ 31                                                               | -33 ≤ h ≤ 33,<br>-10 ≤ k ≤ 10,<br>-19 ≤ l ≤ 19                                                              | -10 ≤ h ≤ 10,<br>-18 ≤ k ≤ 18,<br>-37 ≤ l ≤ 37                                       |
| <b>Radiation</b>                                        | MoK $\alpha$ ( $\lambda = 0.71073$ )                                                                        | MoK $\alpha$ ( $\lambda = 0.71073$ )                                                                        | MoK $\alpha$ ( $\lambda = 0.71073$ )                                                 |
| <b>Reflections Collected</b>                            | 8063                                                                                                        | 27467                                                                                                       | 59278                                                                                |
| <b>Independent Reflections</b>                          | 3051 [ $R_{int} = 0.0216$ ,<br>$R_{sigma} = 0.0270$ ]                                                       | 3319 [ $R_{int} = 0.1047$ ,<br>$R_{sigma} = 0.0495$ ]                                                       | 3698 [ $R_{int} = 0.0619$ ,<br>$R_{sigma} = 0.0219$ ]                                |
| <b>Data/Restraints /Parameters</b>                      | 3051/33/178                                                                                                 | 3319/0/182                                                                                                  | 3698/0/179                                                                           |
| <b>Goodness-of-Fit</b>                                  | 1.065                                                                                                       | 1.015                                                                                                       | 1.060                                                                                |
| <b>Final R Indices [<math>I &gt; 2\sigma(I)</math>]</b> | $R_1 = 0.0328$ ,<br>$wR_2 = 0.0784$                                                                         | $R_1 = 0.0349$ ,<br>$wR_2 = 0.0584$                                                                         | $R_1 = 0.0244$ ,<br>$wR_2 = 0.0433$                                                  |
| <b>R Indices [all data]</b>                             | $R_1 = 0.0431$ ,<br>$wR_2 = 0.0836$                                                                         | $R_1 = 0.0691$ ,<br>$wR_2 = 0.0657$                                                                         | $R_1 = 0.0326$ ,<br>$wR_2 = 0.0459$                                                  |
| <b>Largest Diff. Peak and Hole/ e Å<sup>-3</sup></b>    | 0.31/-0.19                                                                                                  | 0.40/-0.39                                                                                                  | 0.60/-0.67                                                                           |
| <b>2Theta Range (Data Collection)<sup>o</sup></b>       | 6.66 to 49.992                                                                                              | 4.898 to 49.998                                                                                             | 5.172 to 49.996                                                                      |
| <b>CCDC Number</b>                                      | 2381212                                                                                                     | 2270667                                                                                                     | 2381207                                                                              |

**Table S2.** Selected bond lengths and angles for  $(C_6H_8N)_2MnX_4$  (X=Cl, Br, I).

| Atom                                  | Atom | Length/Å | Atom | Atom | Atom | Angle/° |
|---------------------------------------|------|----------|------|------|------|---------|
| <b><math>(C_6H_8N)_2MnCl_4</math></b> |      |          |      |      |      |         |
| Mn1                                   | Cl2  | 2.3421   | Cl2  | Mn1  | Cl1  | 112.859 |
| Mn1                                   | Cl1  | 2.3428   | Cl2  | Mn1  | Cl3  | 111.459 |
| Mn1                                   | Cl3  | 2.3639   | Cl2  | Mn1  | Cl4  | 108.223 |
| Mn1                                   | Cl4  | 2.3739   | Cl1  | Mn1  | Cl3  | 108.377 |
| N1                                    | C5   | 1.339    | Cl1  | Mn1  | Cl4  | 106.062 |
| N1                                    | C1   | 1.326    | Cl3  | Mn1  | Cl4  | 109.697 |
| <b><math>(C_6H_8N)_2MnBr_4</math></b> |      |          |      |      |      |         |
| Mn1                                   | Br2  | 2.4808   | Br2  | Mn1  | Br1  | 112.684 |
| Mn1                                   | Br1  | 2.4896   | Br2  | Mn1  | Br3  | 108.427 |
| Mn1                                   | Br3  | 2.4993   | Br1  | Mn1  | Br3  | 111.061 |
| Mn1                                   | Br4  | 2.5193   | Br2  | Mn1  | Br4  | 105.96  |
| N2                                    | C5   | 1.342    | Br3  | Mn1  | Br4  | 110.06  |
| N2                                    | C1   | 1.337    | Br1  | Mn1  | Br4  | 108.52  |
| <b><math>(C_6H_8N)_2MnI_4</math></b>  |      |          |      |      |      |         |
| I3                                    | Mn1  | 2.7199   | I4   | Mn1  | I3   | 108.12  |
| I4                                    | Mn1  | 2.6839   | I4   | Mn1  | I2   | 112.19  |
| I2                                    | Mn1  | 2.6864   | I4   | Mn1  | I1   | 108.74  |
| I1                                    | Mn1  | 2.7171   | I2   | Mn1  | I3   | 112.24  |
| N2                                    | C11  | 1.356    | I2   | Mn1  | I1   | 105.50  |
| N2                                    | C7   | 1.343    | I1   | Mn1  | I3   | 109.99  |

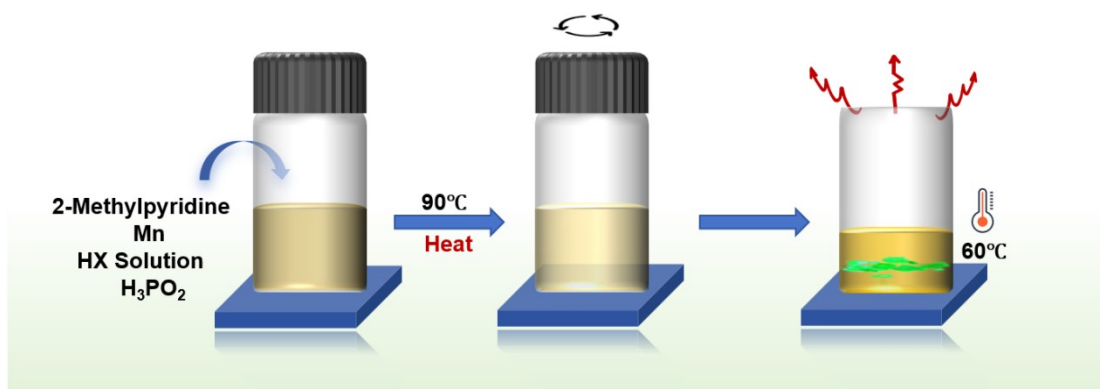

**Fig. S1.** Schematic diagram of  $(C_6H_8N)_2MnX_4$  ( $X=Cl, Br, I$ ) single crystals being grown by the slow solution evaporation method.

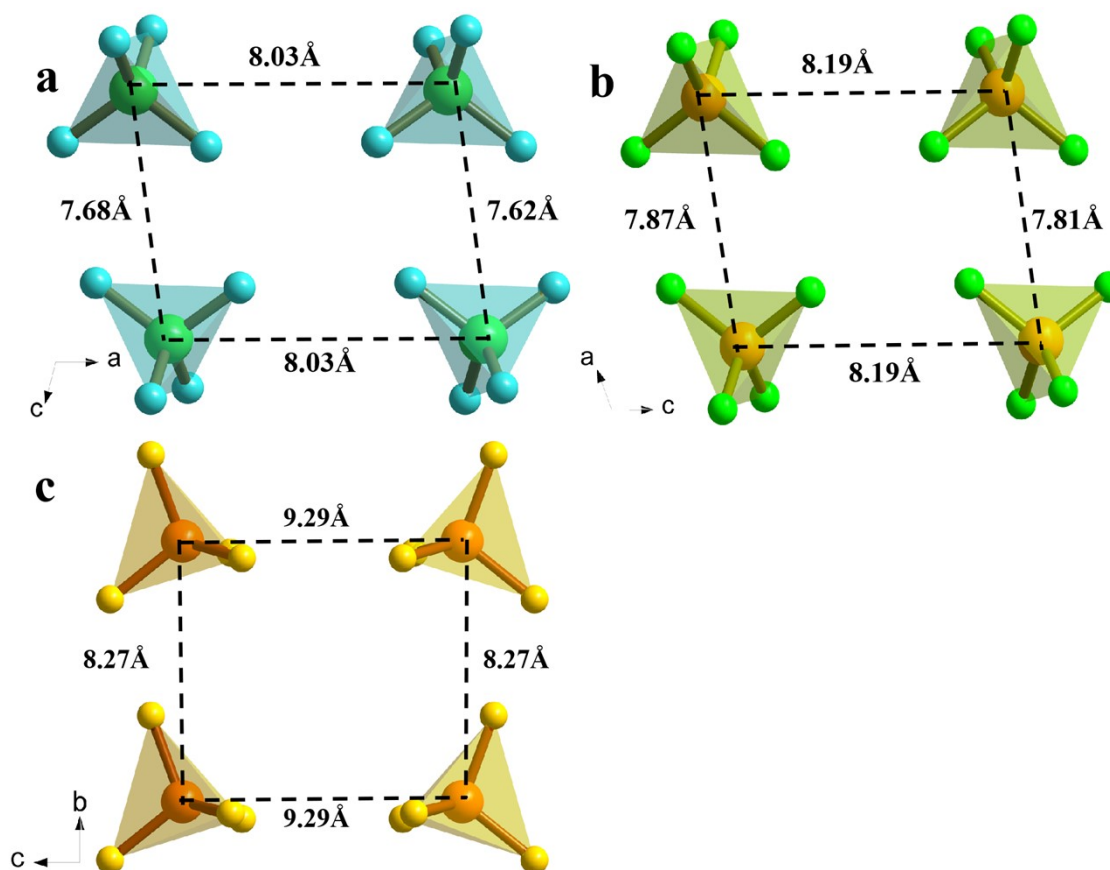

**Fig. S2.** The structure of  $[MnBr_4]^{2-}$ s showing the Mn-Mn distance for (a)  $(C_6H_8N)_2MnCl_4$ , (b)  $(C_6H_8N)_2MnBr_4$  and (c)  $(C_6H_8N)_2MnI_4$ .

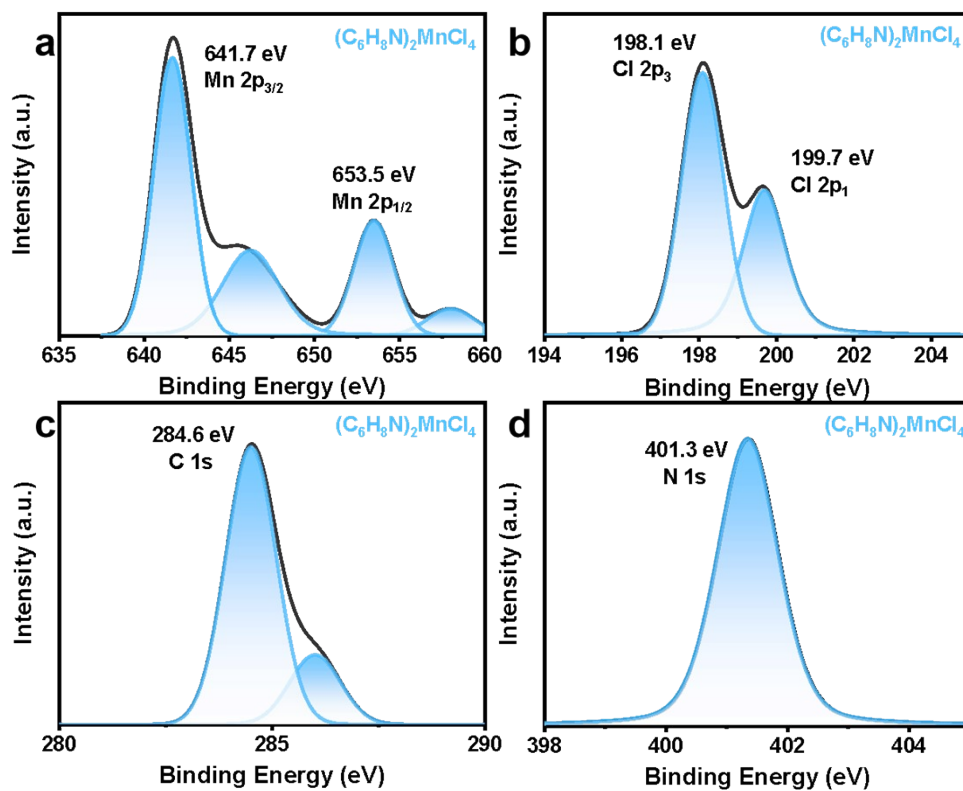

**Fig. S3.** High-resolution XPS spectra of (a) Mn 2p, (b) Cl 2p, (c) C 1s and (d) N 1s of  $(\text{C}_6\text{H}_8\text{N})_2\text{MnCl}_4$ .

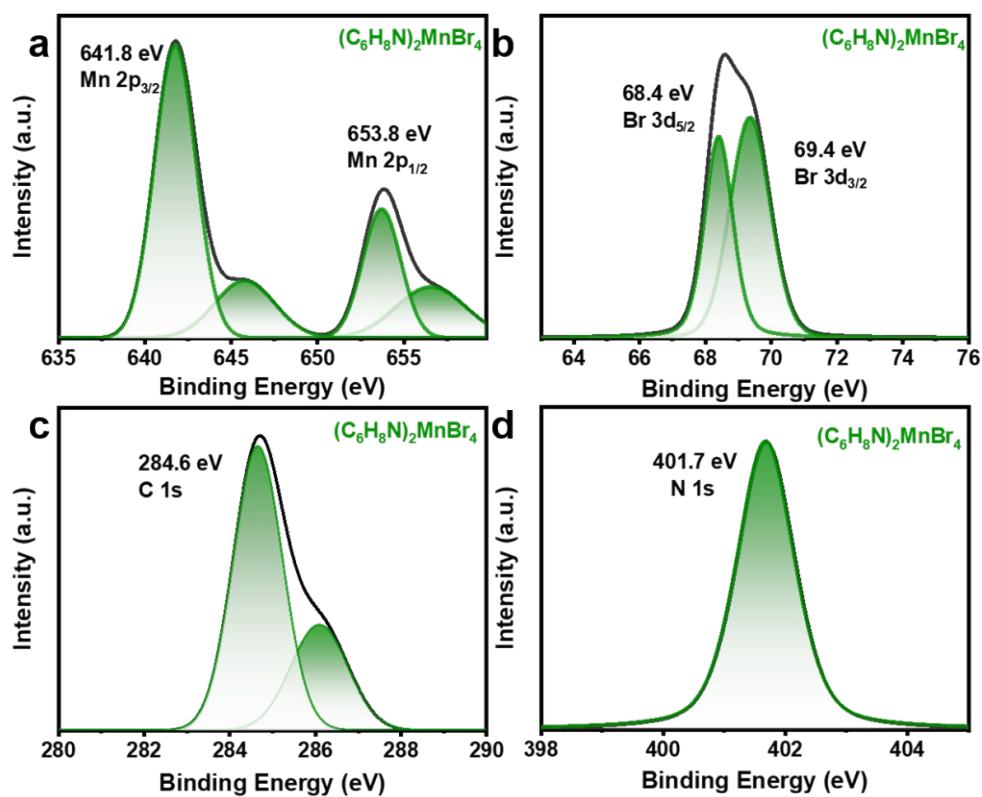

**Fig. S4.** High-resolution XPS spectra of (a) Mn 2p, (b) Br 3d, (c) C 1s and (d) N 1s of  $(\text{C}_6\text{H}_8\text{N})_2\text{MnBr}_4$ .

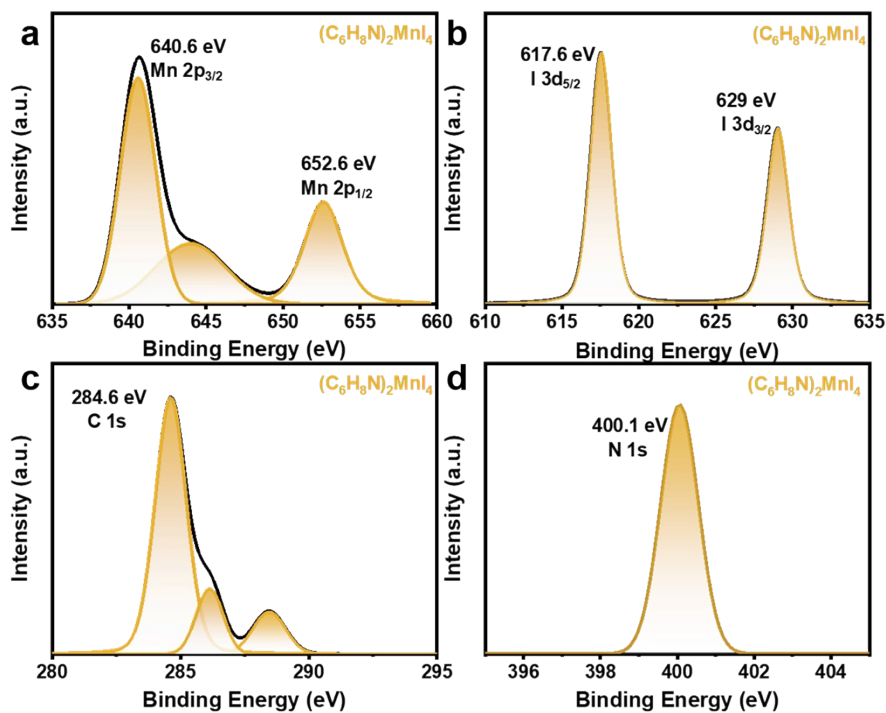

**Fig. S5.** High-resolution XPS spectra of (a) Mn 2p, (b) I 3d, (c) C 1s and (d) N 1s of  $(\text{C}_6\text{H}_8\text{N})_2\text{MnI}_4$ .

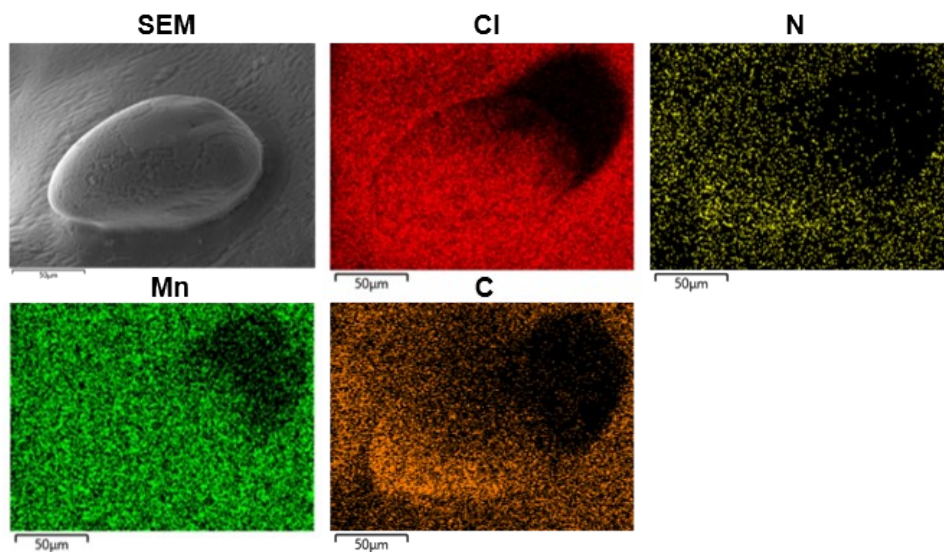

**Fig. S6.** Scanning electron microscopy (SEM) image and energy-dispersive spectroscopy (EDS) elemental mapping images of C, N, Mn and Cl of  $(\text{C}_6\text{H}_8\text{N})_2\text{MnCl}_4$ .

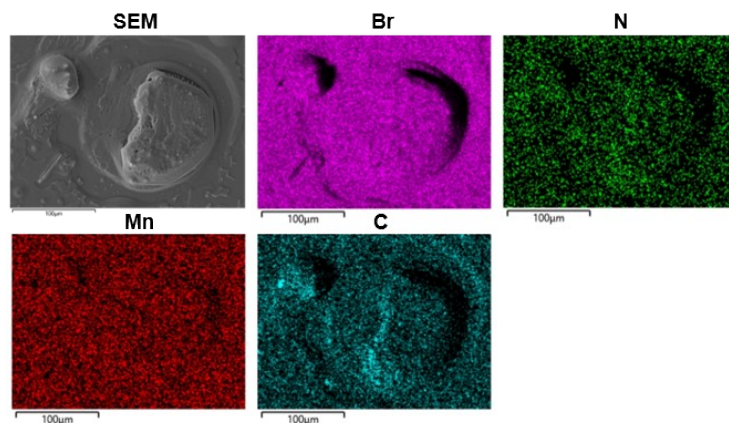

**Fig. S7.** Scanning electron microscopy (SEM) image and energy-dispersive spectroscopy (EDS) elemental mapping images of C, N, Mn and Br of  $(C_6H_8N)_2MnBr_4$ .

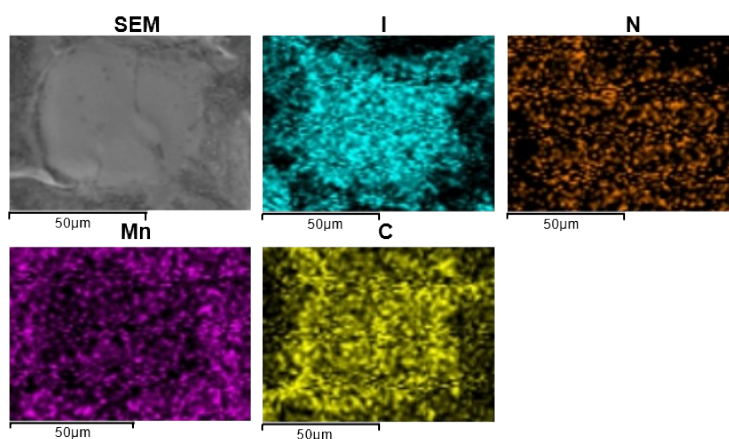

**Fig. S8.** Scanning electron microscopy (SEM) image and energy-dispersive spectroscopy (EDS) elemental mapping images of C, N, Mn and I of  $(C_6H_8N)_2MnI_4$ .

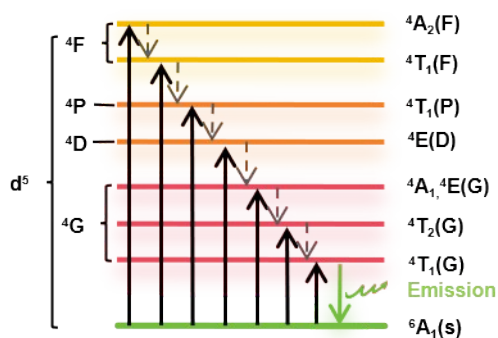

**Fig. S9.** Schematic diagram of the PL mechanism of  $(C_6H_8N)_2MnX_4$  ( $X=Cl, Br, I$ ).



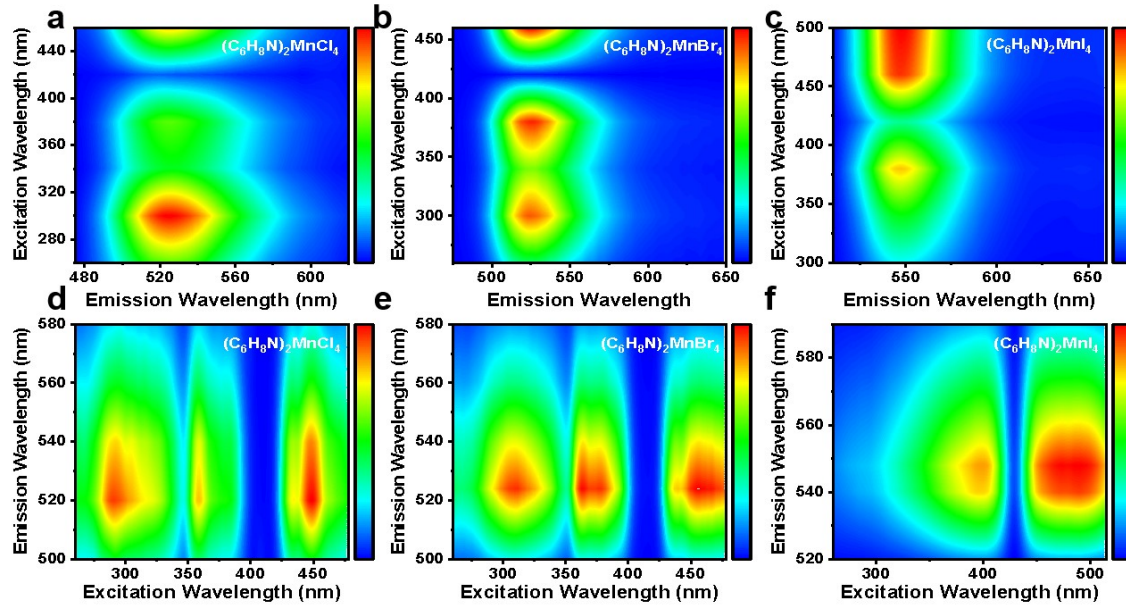

**Fig. S10.** PL spectra excited at different wavelengths of (a)  $(\text{C}_6\text{H}_8\text{N})_2\text{MnCl}_4$ , (b)  $(\text{C}_6\text{H}_8\text{N})_2\text{MnBr}_4$  and (c)  $(\text{C}_6\text{H}_8\text{N})_2\text{MnI}_4$ . PLE spectra at different emission wavelengths of (d)  $(\text{C}_6\text{H}_8\text{N})_2\text{MnCl}_4$ , (e)  $(\text{C}_6\text{H}_8\text{N})_2\text{MnBr}_4$  and (f)  $(\text{C}_6\text{H}_8\text{N})_2\text{MnI}_4$ .

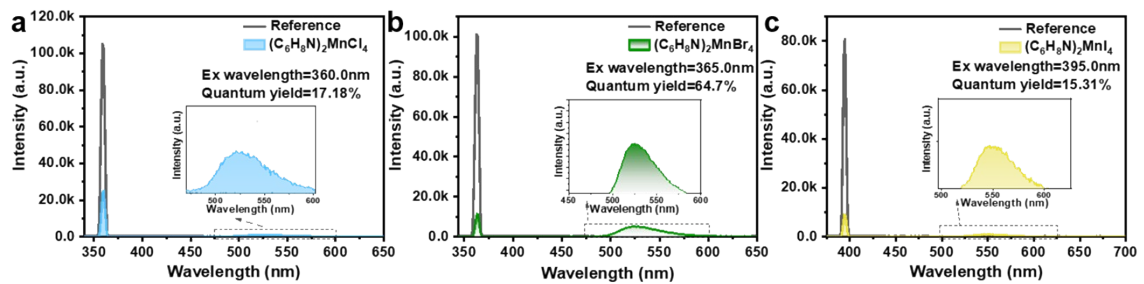

**Fig. S11.** Photoluminescence quantum yield (PLQY) of (a)  $(\text{C}_6\text{H}_8\text{N})_2\text{MnCl}_4$ , (b)  $(\text{C}_6\text{H}_8\text{N})_2\text{MnBr}_4$  and (c)  $(\text{C}_6\text{H}_8\text{N})_2\text{MnI}_4$ .

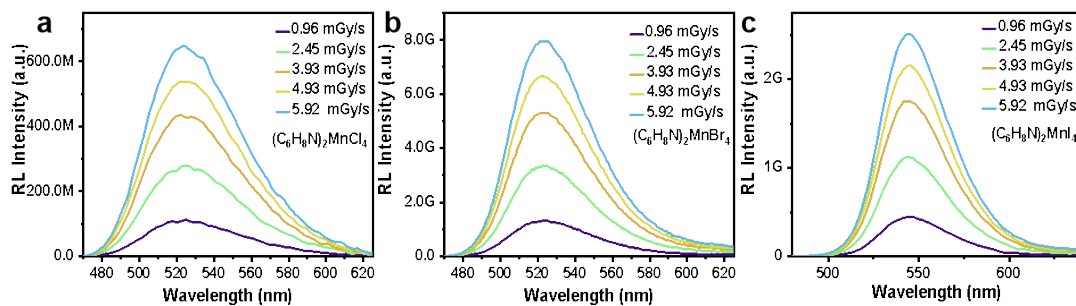

**Fig. S12.** RL spectra of (a)  $(\text{C}_6\text{H}_8\text{N})_2\text{MnCl}_4$ , (b)  $(\text{C}_6\text{H}_8\text{N})_2\text{MnBr}_4$  and (c)  $(\text{C}_6\text{H}_8\text{N})_2\text{MnI}_4$  at different dose rates.



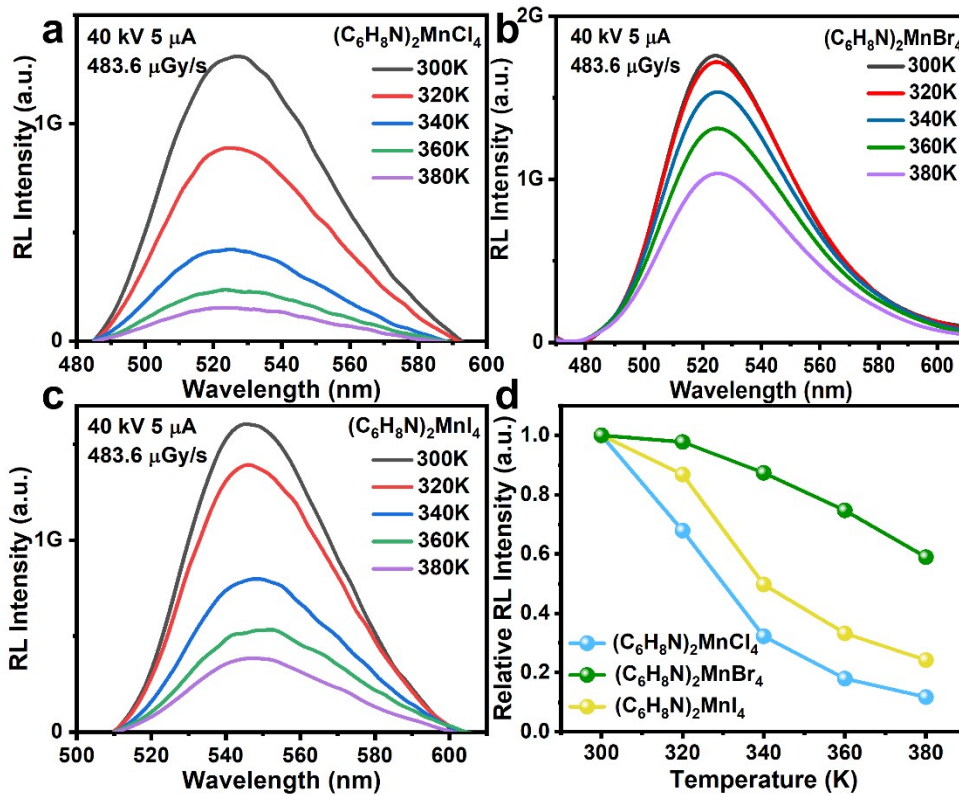

**Fig. S13.** Temperature-independent RL spectrum of (a)  $(C_6H_8N)_2MnCl_4$ , (b)  $(C_6H_8N)_2MnBr_4$  and (c)  $(C_6H_8N)_2MnI_4$ . (d) Temperature-independent RL spectrum intensity of  $(C_6H_8N)_2MnX_4$  (X=Cl, Br, I) and standard BGO scintillators.

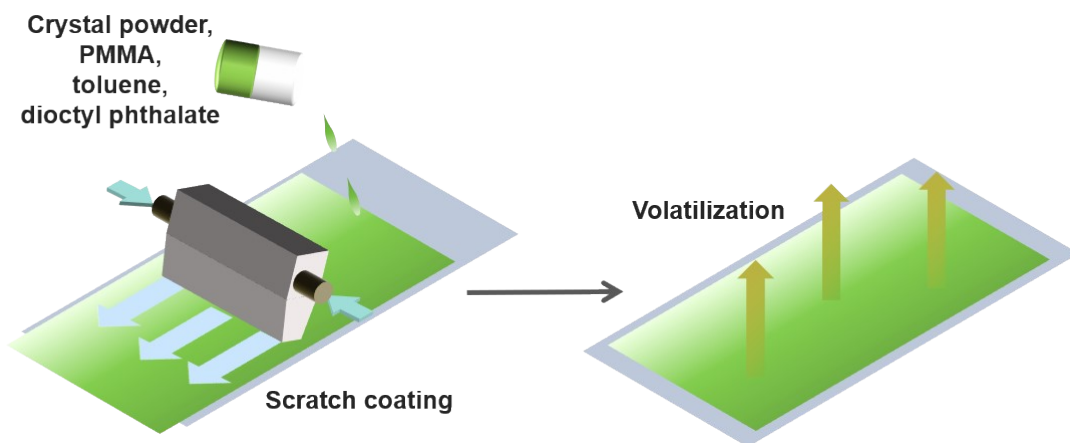

**Fig. S14.** Schematic diagram of preparing  $(C_6H_8N)_2MnBr_4$  scintillator film.

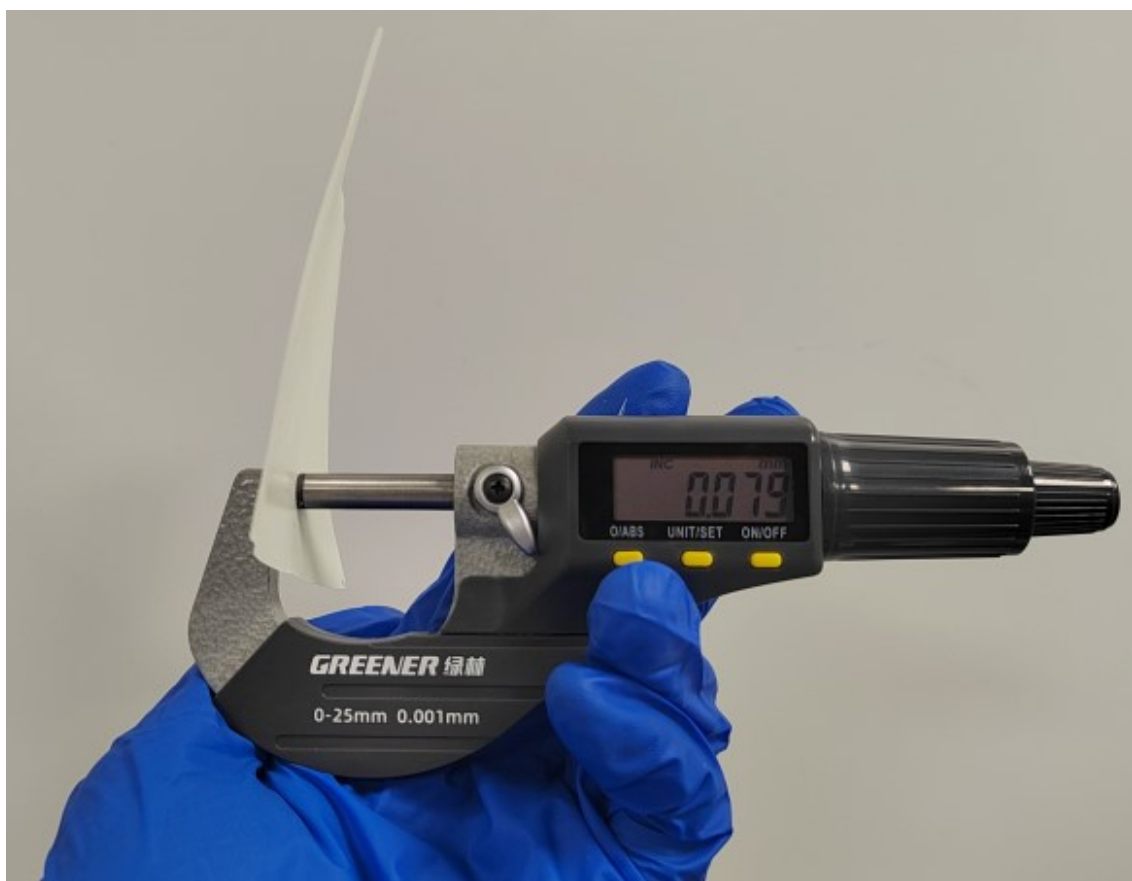

**Fig. S15.** Thickness of  $(\text{C}_6\text{H}_8\text{N})_2\text{MnBr}_4@\text{PMMA}$  film.

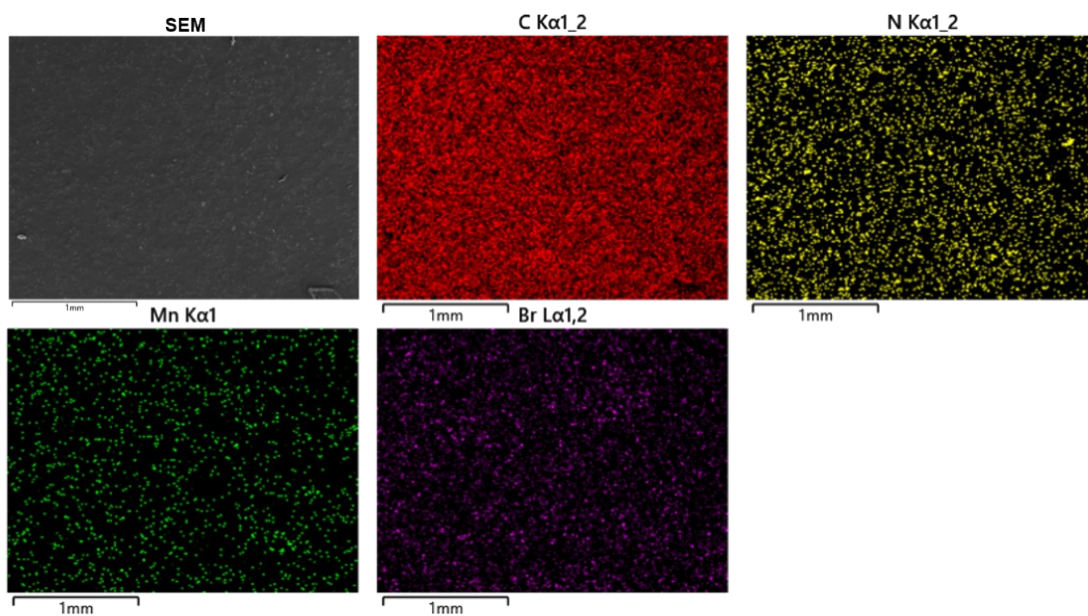

**Fig. S16.** Scanning electron microscopy (SEM) image and Energy-dispersive spectroscopy (EDS) elemental mapping images of C, N, Mn and Br of  $(\text{C}_6\text{H}_8\text{N})_2\text{MnBr}_4@\text{PMMA}$  film.

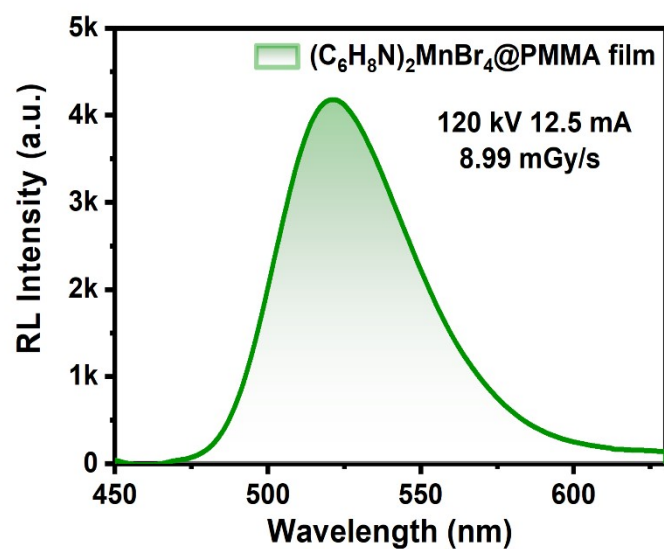

Fig. S17. The RL spectrum of  $(\text{C}_6\text{H}_8\text{N})_2\text{MnBr}_4@PMMA$  film.

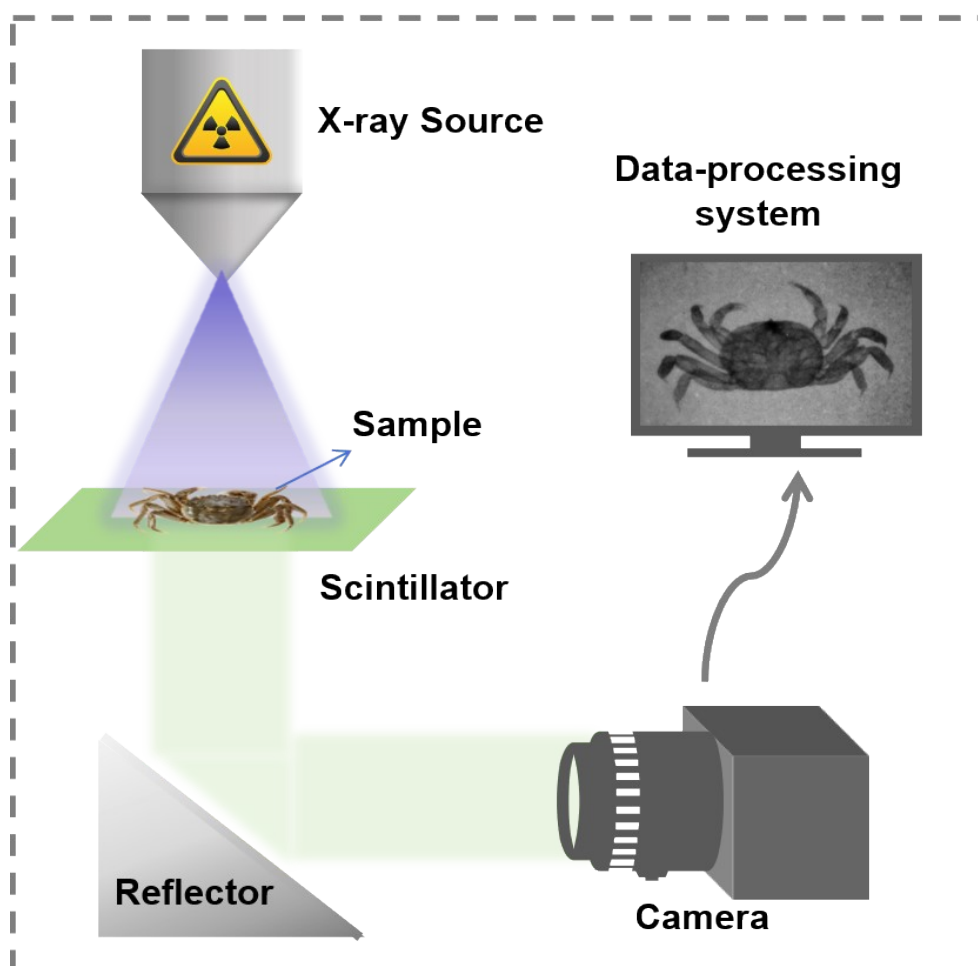

Fig. S18. Schematic diagram of our self-built X-ray imaging system.
